# Supplementary material for: Phenotypic heterogeneity promotes adaptive evolution
Source: PLoS Biol. 2017 May 9;15(5):e2000644. doi: 10.1371/journal.pbio.2000644 (PMC5423553; doi:10.1371/journal.pbio.2000644)
Supplement: S2 Table — (XLSX) [file pbio.2000644.s010.xlsx]

## Sheet: legend
This file contains information of the whole genome sequencing in the evolved strains
Legend for the sheets "noPF and PF"
	Column name	Variable description
	Evolved strain	name of the evolved strain
	Chromosome number	chromosome number
	Chromosome position	nucleotide position
	Reference	nucleotide in the corresponding ancestor
	Allele variant	nucleotide in the corresponding evolved strain
	Reference codon	original codon in the corresponding ancestor
	Reference amino acid	original amino acid in the corresponding ancestor
	Alternative codon	alternative codon in the corresponding evolved strain
	Alternative amino acid	alternative amino acid in the corresponding evolved strain
	Type of mutation	type of mutation (non-synonymous; synonymous; intergenic)
	Region	region, the mutation is identified within (CDS: coding sequence; 5UTR: upstream of the given gene, 3UTR: downstream of the given gene)
	Systematic name	systematic name of the mutated gene
	Standard name	standard name of the mutated gene
	Description (SGD)	description of the mutated gene (soure: SGD)

## Sheet: noPF and PF
Evolved strain	Chromosome number	Chromosome position	Reference	Allele variant	Reference codon	Reference amino acid	Alternative codon	Alternative amino acid	Type of mutation	Region	Systematic name	Standard name	Description (SGD)
noPF-1	chrXV	623485	A	C	AAT	Asn	CAT	His	non-synonymous	CDS	YOR153W	PDR5	Plasma membrane ATP-binding cassette (ABC) transporter, short-lived multidrug transporter actively regulated by Pdr1p; also involved in steroid transport, cation resistance, and cellular detoxification during exponential growth
noPF-1	chrXVI	680383	C	T	CAA	Gln	TAA	Stop	non-synonymous	CDS	YPR065W	ROX1	Heme-dependent repressor of hypoxic genes; contains an HMG domain that is responsible for DNA bending activity
noPF-1	chrV	544687	C	T	CAG	Gln	TAG	Stop	non-synonymous	CDS	YER176W	ECM32	DNA dependent ATPase/DNA helicase belonging to the Dna2p- and Nam7p-like family of helicases that is involved in modulating translation termination; interacts with the translation termination factors, localized to polysomes
noPF-1	chrII	759324	G	A	GAT	Asp	AAT	Asn	non-synonymous	CDS	YBR276C	PPS1	Protein phosphatase with specificity for serine, threonine, and tyrosine residues; has a role in the DNA synthesis phase of the cell cycle
noPF-1	chrX	643306	C	T	CAT	His	TAT	Tyr	non-synonymous	CDS	YJR117W	STE24	Highly conserved zinc metalloprotease that functions in two steps of a-factor maturation, C-terminal CAAX proteolysis and the first step of N-terminal proteolytic processing; contains multiple transmembrane spans
noPF-2	chrXV	621786	G	A	ATG	Met	ATA	Ile	non-synonymous	CDS	YOR153W	PDR5	Plasma membrane ATP-binding cassette (ABC) transporter, short-lived multidrug transporter actively regulated by Pdr1p; also involved in steroid transport, cation resistance, and cellular detoxification during exponential growth
noPF-2	chrIX	202430	T	C	ATT	Ile	ACT	Thr	non-synonymous	CDS	YIL084C	SDS3	Component of the Rpd3p/Sin3p deacetylase complex required for its structural integrity and catalytic activity, involved in transcriptional silencing and required for sporulation; cells defective in SDS3 display pleiotropic phenotypes
noPF-2	chrVII	610826	A	G	CAA	Gln	CGA	Arg	non-synonymous	CDS	YGR060W	ERG25	C-4 methyl sterol oxidase, catalyzes the first of three steps required to remove two C-4 methyl groups from an intermediate in ergosterol biosynthesis; mutants accumulate the sterol intermediate 4,4-dimethylzymosterol
noPF-3	chrXV	623376	A	C	GAA	Glu	GAC	Asp	non-synonymous	CDS	YOR153W	PDR5	Plasma membrane ATP-binding cassette (ABC) transporter, short-lived multidrug transporter actively regulated by Pdr1p; also involved in steroid transport, cation resistance, and cellular detoxification during exponential growth
noPF-3	chrV	544687	C	T	CAG	Gln	TAG	Stop	non-synonymous	CDS	YER176W	ECM32	DNA dependent ATPase/DNA helicase belonging to the Dna2p- and Nam7p-like family of helicases that is involved in modulating translation termination; interacts with the translation termination factors, localized to polysomes
noPF-3	chrVI	240387	G	C	GGG	Gly	GGC	Gly	synonymous	CDS	YFR044C	DUG1	Probable di- and tri-peptidase; forms a complex with Dug2p and Dug3p to degrade glutathione (GSH) and other peptides containing a gamma-glu-X bond in an alternative pathway to GSH degradation by gamma-glutamyl transpeptidase (Ecm38p)
noPF-3	chrII	759324	G	A	GAT	Asp	AAT	Asn	non-synonymous	CDS	YBR276C	PPS1	Protein phosphatase with specificity for serine, threonine, and tyrosine residues; has a role in the DNA synthesis phase of the cell cycle
noPF-3	chrXII	569753	G	C	TGC	Cys	TCC	Ser	non-synonymous	CDS	YLR214W	FRE1	Ferric reductase and cupric reductase, reduces siderophore-bound iron and oxidized copper prior to uptake by transporters; expression induced by low copper and iron levels
noPF-3	chrVII	611321	C	T	GCT	Ala	GTT	Val	non-synonymous	CDS	YGR060W	ERG25	C-4 methyl sterol oxidase, catalyzes the first of three steps required to remove two C-4 methyl groups from an intermediate in ergosterol biosynthesis; mutants accumulate the sterol intermediate 4,4-dimethylzymosterol
noPF-4	chrXV	621828	G	C	TTG	Leu	TTC	Phe	non-synonymous	CDS	YOR153W	PDR5	Plasma membrane ATP-binding cassette (ABC) transporter, short-lived multidrug transporter actively regulated by Pdr1p; also involved in steroid transport, cation resistance, and cellular detoxification during exponential growth
noPF-4	chrVIII	121266	A	G	GTA	Val	GTG	Val	synonymous	CDS	YHR007C	ERG11	Lanosterol 14-alpha-demethylase, catalyzes the C-14 demethylation of lanosterol to form 4,4''-dimethyl cholesta-8,14,24-triene-3-beta-ol in the ergosterol biosynthesis pathway; member of the cytochrome P450 family
noPF-4	chrVI	34727	T	G	TTT	Phe	GTT	Val	non-synonymous	CDS	YFL050C	ALR2	Probable Mg(2+) transporter; overexpression confers increased tolerance to Al(3+) and Ga(3+) ions
noPF-4	chrIV	318510	C	T	CGG	Arg	TGG	Trp	non-synonymous	CDS	YDL077C	VAM6	Vacuolar protein that plays a critical role in the tethering steps of vacuolar membrane fusion by facilitating guanine nucleotidee exchange on small guanosine triphosphatase Ypt7p
noPF-4	chrX	496902	T	G	TCG	Ser	GCG	Ala	non-synonymous	CDS	YJR034W	PET191	Protein required for assembly of cytochrome c oxidase; the authentic, non-tagged protein is detected in highly purified mitochondria in high-throughput studies
PF-1	chrXV	621403	T	A	TTT	Phe	ATT	Ile	non-synonymous	CDS	YOR153W	PDR5	Plasma membrane ATP-binding cassette (ABC) transporter, short-lived multidrug transporter actively regulated by Pdr1p; also involved in steroid transport, cation resistance, and cellular detoxification during exponential growth
PF-1	chrIV	589872	C	A	CCA	Pro	ACA	Thr	non-synonymous	CDS	YDR072C	IPT1	Inositolphosphotransferase 1, involved in synthesis of mannose-(inositol-P)2-ceramide (M(IP)2C), which is the most abundant sphingolipid in cells, mutation confers resistance to the antifungals syringomycin E and DmAMP1 in some growth media
PF-1	chrXVI	680329	A	T	AGA	Arg	TGA	Stop	non-synonymous	CDS	YPR065W	ROX1	Heme-dependent repressor of hypoxic genes; contains an HMG domain that is responsible for DNA bending activity
PF-2	chrIV	590789	C	T	ATC	Ile	ATT	Ile	synonymous	CDS	YDR072C	IPT1	Inositolphosphotransferase 1, involved in synthesis of mannose-(inositol-P)2-ceramide (M(IP)2C), which is the most abundant sphingolipid in cells, mutation confers resistance to the antifungals syringomycin E and DmAMP1 in some growth media
PF-2	chrXII	557442	G	T	GAA	Glu	TAA	Stop	non-synonymous	CDS	YLR207W	HRD3	Resident protein of the ER membrane that plays a central role in ER-associated protein degradation (ERAD), forms HRD complex with Hrd1p and ERAD determinants that engages in lumen to cytosol communication and coordination of ERAD events
PF-2	chrXV	622688	A	C	CAG	Gln	CCG	Pro	non-synonymous	CDS	YOR153W	PDR5	Plasma membrane ATP-binding cassette (ABC) transporter, short-lived multidrug transporter actively regulated by Pdr1p; also involved in steroid transport, cation resistance, and cellular detoxification during exponential growth
PF-2	chrXVI	679936	T	C	TAC	Tyr	CAC	His	non-synonymous	CDS	YPR065W	ROX1	Heme-dependent repressor of hypoxic genes; contains an HMG domain that is responsible for DNA bending activity
PF-3	chrXV	621622	C	G	CAT	His	GAT	Asp	non-synonymous	CDS	YOR153W	PDR5	Plasma membrane ATP-binding cassette (ABC) transporter, short-lived multidrug transporter actively regulated by Pdr1p; also involved in steroid transport, cation resistance, and cellular detoxification during exponential growth
PF-3	chrVII	611096	G	T	AGA	Arg	ATA	Ile	non-synonymous	CDS	YGR060W	ERG25	C-4 methyl sterol oxidase, catalyzes the first of three steps required to remove two C-4 methyl groups from an intermediate in ergosterol biosynthesis; mutants accumulate the sterol intermediate 4,4-dimethylzymosterol
PF-3	chrXIV	654238	G	A	ACG	Thr	ACA	Thr	synonymous	CDS	YNR015W	SMM1	Dihydrouridine synthase, member of a family of dihydrouridine synthases including Dus1p, Smm1p, Dus3p, and Dus4p; modifies uridine residues at position 20 of cytoplasmic tRNAs
PF-3	chrXI	656329	C	G	CCT	Pro	GCT	Ala	non-synonymous	CDS	YKR103W	NFT1	Putative transporter of the multidrug resistance-associated protein (MRP) subfamily; adjacent ORFs YKR103W and YKR104W are merged in different strain backgrounds.
PF-3	chrXI	471036	C	A	GAC	Asp	GAA	Glu	non-synonymous	CDS	YKR016W	FCJ1	Protein of unknown function; non-tagged protein is detected in purified mitochondria in high-throughput studies; null mutant displays decreased frequency of mitochondrial genome loss and severe growth defect in minimal glycerol media
PF-4	chrIII	36239	G	T	TCG	Ser	TCT	Ser	synonymous	CDS	YCL051W	LRE1	Protein involved in control of cell wall structure and stress response; inhibits Cbk1p protein kinase activity; overproduction confers resistance to cell-wall degrading enzymes
PF-4	chrXI	400538	G	A	GGG	Gly	GGA	Gly	synonymous	CDS	YKL020C	SPT23	ER membrane protein involved in regulation of OLE1 transcription, acts with homolog Mga2p; inactive ER form dimerizes and one subunit is then activated by ubiquitin/proteasome-dependent processing followed by nuclear targeting
PF-4	chrXIV	211673	G	A					intergenic	5UTR	YNL233W	BNI4	Targeting subunit for Glc7p protein phosphatase; localized to the bud neck, required for localization of chitin synthase III to the bud neck via interaction with the chitin synthase III regulatory subunit Skt5p 2
PF-4	chrVII	488736	T	A	ATC	Ile	AAC	Asn	non-synonymous	CDS	YGL006W	PMC1	Vacuolar Ca2+ ATPase involved in depleting cytosol of Ca2+ ions; prevents growth inhibition by activation of calcineurin in the presence of elevated concentrations of calcium; similar to mammalian PMCA1a
PF-4	chrXVI	680281	C	T	CAA	Gln	TAA	Stop	non-synonymous	CDS	YPR065W	ROX1	Heme-dependent repressor of hypoxic genes; contains an HMG domain that is responsible for DNA bending activity
PF-4	chrXVI	121476	A	C					intergenic	5UTR	YPL226W	NEW1	ATP binding cassette protein; cosediments with polysomes and is required for biogenesis of the small ribosomal subunit; Asn/Gln-rich rich region supports [NU+] prion formation and susceptibility to [PSI+] prion induction 1 2 3 4
PF-4	chrXV	622689	G	C	CAG	Gln	CAC	His	non-synonymous	CDS	YOR153W	PDR5	Plasma membrane ATP-binding cassette (ABC) transporter, short-lived multidrug transporter actively regulated by Pdr1p; also involved in steroid transport, cation resistance, and cellular detoxification during exponential growth
